# Supplementary material for: A nickel and cobalt bimetal organic framework with high capacity as an anode material for lithium-ion batteries
Source: Royal Society of Chemistry journal article supplement (doi:10.1039/d0se00983k), 2020-01-01
Supplement: d0se00983k1.pdf [file d0se00983k1.pdf]

## Supporting Information

Nickel and Cobalt Bimetal Organic Framework with High Capacity as  
an Anode Material for Lithium-ion Batteries

Wen Zheng,<sup>a,b</sup> Wanying Bi,<sup>a,b</sup> Xuenong Gao,<sup>a,b</sup> Zhengguo Zhang,<sup>a</sup> Wenhui  
Yuan,<sup>\*,a,b</sup> and Li Li<sup>\*,b,c</sup>

a. School of Chemistry and Chemical Engineering, South China University of  
Technology, Guangzhou, 510640, China.

b. Guangdong Engineering Technology Research Center of Advanced Insulating  
Coating.

c. School of Environment and Energy, South China University of Technology,  
Guangzhou 510006, China.

\*Corresponding author: cewhyuan@scut.edu.cn (Wenhui Yuan); lli@scut.edu.cn (Li  
Li).

**Table S1.** Comparison between the reported MOFs as anode materials for LIBs.

| Materials                             | Current Density (mA g <sup>-1</sup> ) | Cycle Number | Specific Capacity (mA h g <sup>-1</sup> ) | Ref.      |
|---------------------------------------|---------------------------------------|--------------|-------------------------------------------|-----------|
| Co <sub>2</sub> (OH) <sub>2</sub> BDC | 50                                    | 100          | 650                                       | S1        |
| Co-BTC                                | 100                                   | 60           | 700                                       | S2        |
| CoZn-ZIF                              | 100                                   | 100          | 605.8                                     | S3        |
| Cu-BTC                                | 96                                    | 50           | 500                                       | S4        |
| Fe(Zn)-BDC@300                        | 100                                   | 120          | 863.4                                     | S5        |
| LiNi-NTC                              | 100                                   | 80           | 475                                       | S6        |
| Mn-BTC                                | 103                                   | 100          | 964                                       | S7        |
| Zn <sub>3</sub> (HCOO) <sub>6</sub>   | 60                                    | 60           | 560                                       | S8        |
| Ni-BHC                                | 100                                   | 50           | 1261.3                                    | S9        |
| Ni-Co-BTC                             | 200                                   | 80           | 1242                                      | This work |

## References

- S1** L. Gou, L. Hao, Y.X. Shi, S. Ma, X. Fan, L. Xu, D. Li and K. Wang, *J. Solid State Chem.*, 2014, **210**, 121-124.
- S2** D. Ge, J. Peng, G. Qu, H. Geng, Y. Deng, J. Wu, X. Cao, J. Zheng and H. Gu, *New J. Chem.*, 2016, **40**, 9238-9244.
- S3** X. Lou, Y. Ning, C. Li, X. Hu, M. Shen and B. Hu, *Science China Materials*, 2018, **61**, 1040-1048.
- S4** S. Maiti, A. Pramanik, U. Manju and S. Mahanty, *Micropor. Mesopor. Mat.*, 2016, **226**, 353-359.
- S5** X. Lou, H. Hu, C. Li, X. Hu, T. Li, M. Shen, Q. Chen and B. Hu, *RSC Adv.*, 2016, **6**, 86126-86130.
- S6** X. Han, F. Yi, T. Sun and J. Sun, *Electrochem. Commun.*, 2012, **25**, 136-139.
- S7** S. Maiti, A. Pramanik, U. Manju and S. Mahanty, *ACS Appl. Mater. Inter.*, 2015, **7**, 16357-16363.
- S8** K. Saravanan, M. Nagarathinam, P. Balaya and J.J. Vittal, *Journal of Materials Chemistry*, 2010, **20**, 8329.
- S9** X. Lou, Y. Ning, C. Li, M. Shen, B. Hu, X. Hu and B. Hu, *Inorg. Chem.*, 2018, **57**, 3126-3132.
